# Supplementary material
Source: publisher figshare collection journal article supplement (https://tandf.figshare.com/articles/dataset/_/16556591)
Supplement: Supplementary file 2 [file 2]

Colour coding:

Black = any actant, text or arrow that was only included on Map 1

Green = any actant, text or arrow that was included on Map 2 and was not included on Map 1

Blue = any actant, text or arrow that was included on both Map 1 and Map 2
